# Supplementary material for: PEO Coatings Modified with Halloysite Nanotubes: Composition, Properties, and Release Performance
Source: MDPI journal article supplement (doi:10.3390/ijms24010305), 2022-12-24
Supplement: s1 [file s1]

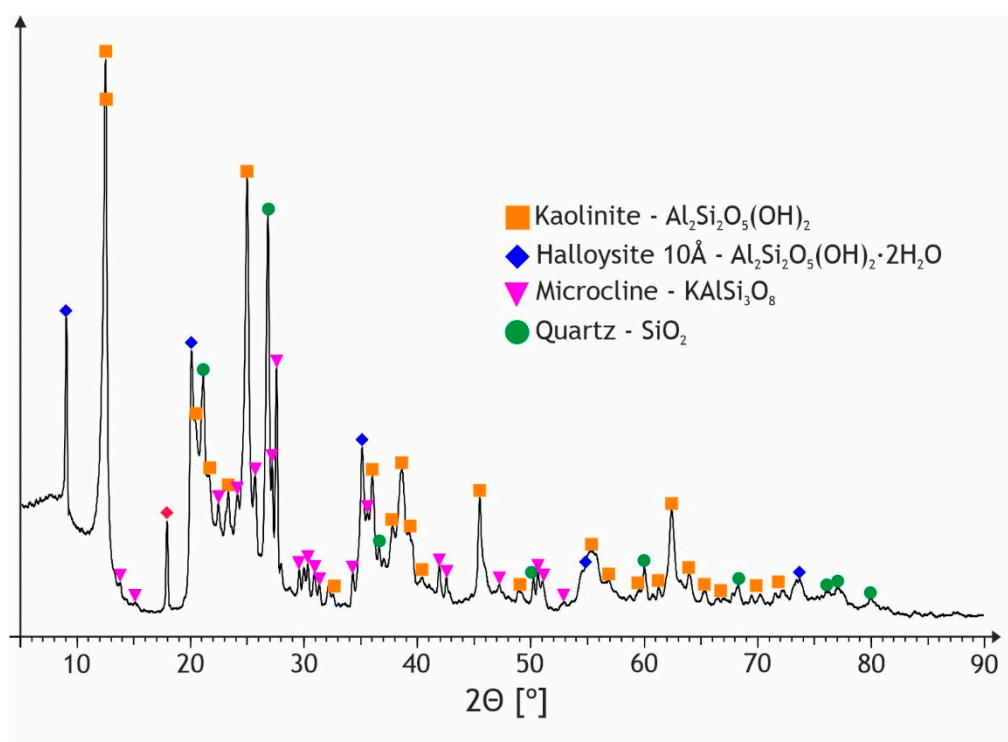

Figure. S1. X-ray diffraction pattern of the used halloysite nanotubes.

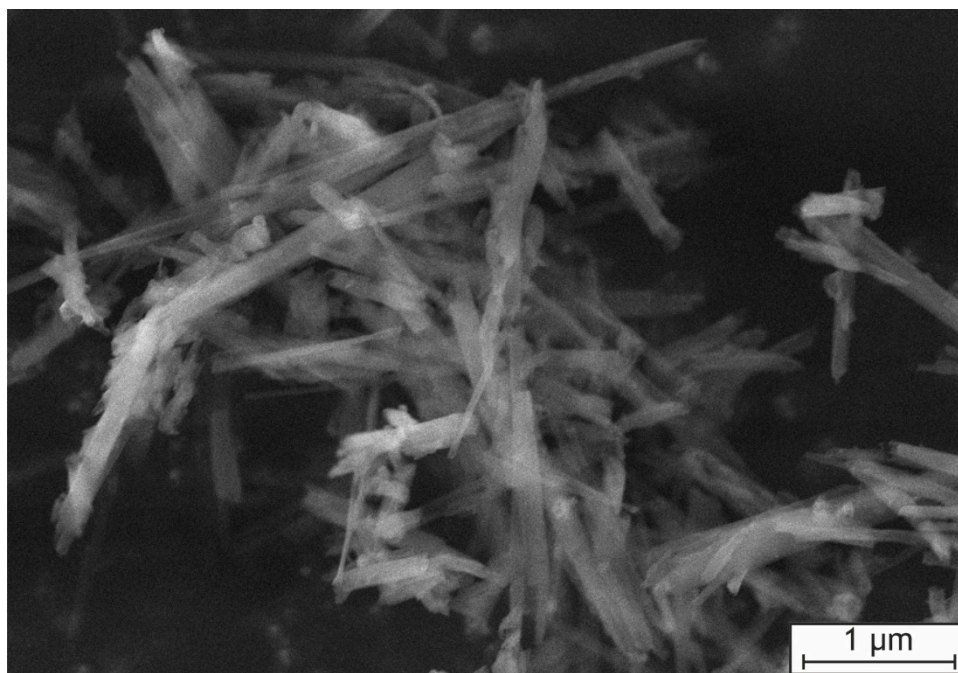

Figure. S2. SEM image the used halloysite nanotubes.
